# Supplementary material for: Reduced decay-accelerating factor expression promotes complement-mediated cystogenesis in murine ADPKD
Source: PubMed Central journal article supplement (PMC11383362; doi:10.1172/jci.insight.175220), 2024-05-23
Supplement: jciinsight-9-175220-s154.pdf [file jciinsight-9-175220-s154.pdf]

## Supplemental Materials

- **Supplemental Table S1.** Primers used for mouse genotyping: page 2
- **Supplemental Table S2.** Primers used for mouse genotyping: page 2
- **Supplemental Figure 1.** DAF transgenic expression.
  
- **Supplementary Table S1. Primers used for mouse genotyping.**

| <b>Genotyping Primers</b> |                        |                         |
|---------------------------|------------------------|-------------------------|
| <b>Gene</b>               | <b>Forward Primer</b>  | <b>Reverse Primer</b>   |
| <i>C3-1 WT</i>            | AGGGCGAGAACTGCATAAAGG  | GTTGTTCACGCAGCTTGGT     |
| <i>C3 KO</i>              | CCAGGGCGAGAACTGCAT     | CAGACTGCCTTGGGAAAAGC    |
| <i>Pax8</i>               | CCATGTCTAGACTGGACAAGA  | CTCCAGGCCACATATGATTAG   |
| <i>Pkd1</i>               | CCTGCCTTGCTCTACTTTCC   | AGGGCTTTTCTTGCTGGTCT    |
| <i>Cre</i>                | ATTGCTGTCACTTGGTCGTGGC | GGAAAATGCTTCTGTCCGTTTGC |

**Supplementary Table S2. Primers for Quantitative RT-PCR.**

| <b>Gene Expression Primers</b> |                         |                          |
|--------------------------------|-------------------------|--------------------------|
| <b>Gene</b>                    | <b>Assay ID</b>         | <b>Brand</b>             |
| <i>C3</i>                      | Mm01232779_m1           | Thermo Fisher Scientific |
| <i>C5</i>                      | Mm00439275_m1           | Thermo Fisher Scientific |
| <i>CfB</i>                     | Mm00433909_m1           | Thermo Fisher Scientific |
| <i>CfH</i>                     | Mm01299248_m1           | Thermo Fisher Scientific |
| <i>C3aR</i>                    | Mm02620006_s1           | Thermo Fisher Scientific |
| <i>C5aR1</i>                   | Mm00500292_s1           | Thermo Fisher Scientific |
| <i>Daf</i>                     | Mm00438377_m1           | Thermo Fisher Scientific |
| <i>Cd59</i>                    | Mm00483149_m1           | Thermo Fisher Scientific |
| <i>Crry</i>                    | Mm00785297_s1           | Thermo Fisher Scientific |
| <i>Cd11c</i>                   | Mm00498698_m1           | Thermo Fisher Scientific |
| <i>Cd11b</i>                   | Mm00434455_m1           | Thermo Fisher Scientific |
| <i>Cd8</i>                     | Mm01182107_g1           | Thermo Fisher Scientific |
| <i>Cd4</i>                     | Mm00442754_m1           | Thermo Fisher Scientific |
| <i>Foxp3</i>                   | Mm00475162_m1           | Thermo Fisher Scientific |
| <i>Gapdh</i>                   | Mm99999915_g1           | Thermo Fisher Scientific |
| <b>Gene</b>                    | <b>Forward Primer</b>   | <b>Reverse Primer</b>    |
| <i>Ccl2</i>                    | GACCCGTAATCTGAAGCTAA    | CACACTGGTCACTCCTACAGAA   |
| <i>Il-1b</i>                   | GCAACTGTTCCCTGAACTCAACT | ATCTTTTGGGGTCCGTCAACT    |
| <i>Il-6</i>                    | GCACCTCAGATTGTTGTTG     | AAATAGTGTCCTAACGCTCATAC  |
| <i>Tnfa</i>                    | TCACTGGAGCCTCGAATGTC    | GTGAGGAAGGCTGTGCATTG     |
| <i>Rps11</i>                   | CGTGACGAAGATGAAGATGC    | GCACATTGAATCGCACAGTC     |

**A**

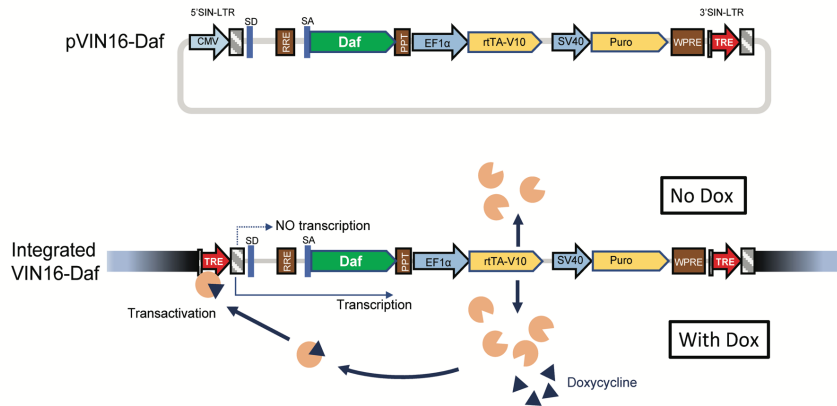

**B**

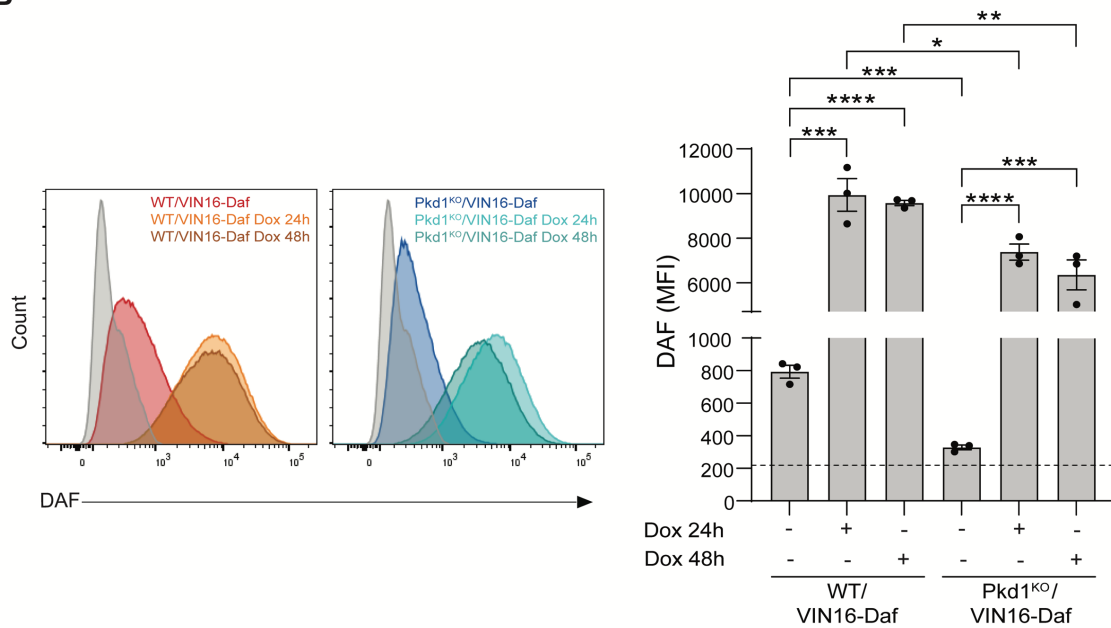

**Supplemental Figure 1. DAF transgenic expression. (A)** Representative scheme of puromycin selectable VIN16-Daf lentivector construct. **(B)** Representative plots and **(C)** data quantification of DAF in WT/VIN16-Daf and PKD<sup>KO</sup>/VIN16-Daf tubular cells with or without Doxycycline (Dox). Dotted line: isotype. ANOVA \*P < 0.05; \*\*\*\*P < 0.0001.
