# Supplementary material for: Reduced decay-accelerating factor expression promotes complement-mediated cystogenesis in murine ADPKD
Source: JCI journal article supplement (doi:10.1172/jci.insight.175220), 2024-05-23
Supplement: sd2 [file 2]

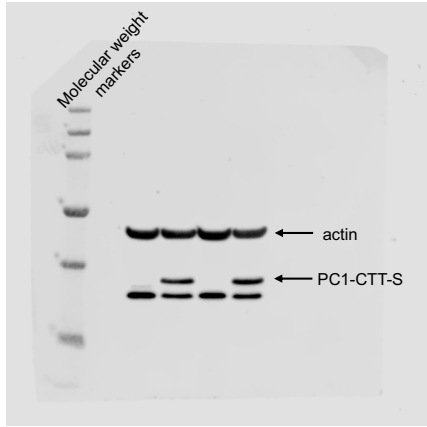

Figure 7A. Full image. Following lysates transfer, PVDF membrane was incubated with anti S-Tag antibody and anti-actin antibodies. The lowest band is a ubiquitously expressed protein recognized by the antibody (likely an endogenous ribonuclease containing the sequence from which the S-tag is derived) that is not affected by the transduction.
